1 **Type of Paper: Research Article**

2

3 **Title: Loop-mediated isothermal amplification assay for *Enterococcus sp.*, *E. coli* and**  
4 ***S. aureus* in chicken**

5

6 **Running title: LAMP for detection of *Enterococcus sp.*, *E. coli* and *S. aureus***

7

8

9 **The name of each author: HyeSoon Song<sup>1</sup>, YouChan Bae<sup>1</sup>, HyukMan Kwon<sup>1</sup>, YongKuk**  
10 **Kwon<sup>1</sup> and SeongJoon Joh<sup>1\*</sup>**

11 Avian disease division, Animal and Plant Quarantine Agency, HyukSin 8-ro, GimCheon,  
12 Republic of Korea

13 **\*Corresponding author:**

14 Address: 177, HyukSin 8-ro, GimCheon, Gyeongsangbuk-do, 39660, Republic of Korea.

15 Avian Diseases Division, Animal and Plant Quarantine Agency

16 Name: SeongJoon Joh

17 E-mail: [johsj0901@korea.kr](mailto:johsj0901@korea.kr)

18 Tel: +82-54-912-0815

19 Major: Diagnosis of Avian Diseases

20

21 **ABSTRACT**

22 Bacterial chondronecrosis with osteomyelitis (BCO) is a major cause of lameness in broiler  
23 chicken, and results in serious economic losses worldwide. Although the pathogenesis  
24 mechanism leading to lameness is not entirely understood, some strains of *Enterococcus sp.*,  
25 avian pathogenic *Escherichia coli*, or *Staphylococcus aureus* have been long recognized as  
26 important causative pathogens. To prevent the progression of *Enterococcus sp.*, avian pathogenic  
27 *E. coli*, or *S. aureus* infections, we developed rapid, sensitive, and convenient diagnostic assays  
28 using loop-mediated isothermal amplification (LAMP). Entero-Common-LAMP assays were  
29 developed for a simultaneous detection of eight *Enterococcus* species. To target specific  
30 microorganisms, seven Entero-Specific-LAMP assays for *E. faecalis*, *E. faecium*, *E. hirae*, *E.*  
31 *gallinarum*, *E. avium*, *E. durans* and *E. cecorum*, and *E. coli*-LAMP and *S. aureus*-LAMP assays,  
32 were developed. Considering the prevalence and economic impact of *Enterococcus sp.*, *E. coli*,  
33 and *S. aureus*, the developed ten different LAMP assays have a considerable potential as routine  
34 diagnostic methods in the field or in resource-limited environments.

35

36

37 **KEY WORDS** LAMP, *Enterococcus sp.*, *E. coli*, *Staphylococcus aureus*

38

39

40

41

42

43

44 Bacterial chondronecrosis with osteomyelitis (BCO) in broiler chicken compromises chicken  
45 welfare and causes serious economic losses to the poultry industry worldwide because of  
46 reduced chicken productivity and death (12). BCO, including osteomyelitis, femoral head  
47 necrosis, long bone necrosis, proximal femoral degeneration, bacterial chondritis with  
48 osteomyelitis, and bacterial chondronecrosis, is an important cause of lameness in broiler  
49 chicken (13, 18). BCO was first reported in 1972, and the incidence of lameness with BCO has  
50 increased significantly in Australia, USA, Canada, and Europe over the past two decades, with  
51 recent reports indicating that over 1% of all broilers grown to heavy processing weights may be  
52 affected after 5 wk of age (12, 25, 29). An investigation in Bulgaria revealed the significant scale  
53 of the problem, with lameness accounting for 10% of mortality in lame chickens, and BCO  
54 accounting for more than 90% of these cases (5). Although the complex pathogenicity  
55 mechanism of BCO is not entirely understood, *Enterococcus sp.*, avian pathogenic *Escherichia*  
56 *coli*, and *Staphylococcus aureus* are recognized important pathogens associated with BCO (5, 7,  
57 17, 23, 29-30). These bacteria are ubiquitous in poultry environments where the birds are  
58 hatched, reared, or processed; they are transmitted to chicks from breeder parents, contaminated  
59 eggs, or hatchery sources by opportunistic infection (18, 29). Further, BCO appears to occur  
60 when *Enterococcus sp.*, *E. coli*, or *S. aureus* infects the broilers via the integument, respiratory  
61 system, or gastrointestinal tract; circulates in the bloodstream; and forms micro-abscesses that  
62 cause infarction and local metaphyseal bone necrosis (17, 29). The condition of broiler chicken  
63 affected by BCO usually progresses fairly rapidly from mild to severe lameness.

64 Development of a rapid and specific method for the detection of *Enterococcus sp.*, *E. coli*, or  
65 *S. aureus* infection in the field and in resource-limited environments is important for the  
66 prevention of the progression of BCO. Loop-mediated isothermal amplification (LAMP) is a

67 highly specific, efficient, and rapid method based on 2–3 sets of primers that target a gene under  
68 isothermal conditions, with no special equipment for DNA amplification required. After the  
69 LAMP reaction, a positive result is detected by assessing increase in sample turbidity  
70 (determined using a real-time turbidity meter) caused by the formation of a magnesium  
71 pyrophosphate byproduct, or by visual inspection (color change); there is no need for agarose gel  
72 electrophoresis (6, 19, 21).

73 In the current study, by targeting highly conserved genes of BCO-associated bacteria, we  
74 successfully developed an Entero-Common-LAMP assay for a simultaneous detection of  
75 common enterococcus gene of eight *Enterococcus sp.* (*E. faecalis*, *E. faecium*, *E. hirae*, *E.*  
76 *gallinarum*, *E. avium*, *E. durans*, *E. cecorum*, and *E. columbae*), seven types of Entero-Specific-  
77 LAMP assays for a specific detection of seven *Enterococcus sp.* (*E. faecalis*, *E. faecium*, *E. hirae*,  
78 *E. gallinarum*, *E. avium*, *E. durans*, and *E. cecorum*); and *E. coli*-LAMP and *S. aureus*-LAMP  
79 assays.

80

## 81 MATERIALS AND METHODS

82 **Bacterial and viral strains.** *Enterococcus* strains *E. faecalis* (ATCC 29212), *E. faecium*  
83 (ATCC 19434), *E. hirae* (ATCC 8043), *E. gallinarum* (ATCC 49573), *E. avium* (ATCC 14025),  
84 *E. durans* (ATCC 19432), *E. cecorum* (ATCC 43198), *E. columbae* (ATCC 51263), *E. mundtii*  
85 (ATCC 43186), *E. saccharolyticus* (ATCC 43076), *E. casseliflavus* (ATCC 25788), and *E.*  
86 *sulfureus* (ATCC 49903); *Escherichia coli* (ATCC 25922); *Staphylococcus* strains *S. aureus*  
87 (ATCC 25923), *S. cohnii* (ATCC 35662), *S. xylosus* (ATCC 29971), *S. lentus* (ATCC 49574), *S.*  
88 *hominis* (field isolate), and *S. epidermidis* (field isolate); *Ornithobacterium rhinotracheale* (field  
89 isolate); *Pasteurella multocida* (field isolate); *Mycoplasma gallisepticum* (ATCC 19610);

90 *Mycoplasma synoviae* (ATCC 25204); *Bacillus cereus* (ATCC 14579); *Campylobacter coli*  
91 (ATCC 33559); *Clostridium perfringens* (ATCC 13124); *Campylobacter jejuni* (ATCC 33560);  
92 *Salmonella enteritidis* (ATCC 31194); chicken infectious anemia virus (CIAV, field isolate);  
93 reticuloendotheliosis virus (REV, field isolate); and Marek's disease virus (MDV, ATCC VR-  
94 624™) were from the American Type Culture Collection, and used as reference strains in the  
95 current study.

96 **Isolation of DNA.** Total bacterial and viral DNA was extracted from the microorganisms  
97 using QIAamp DNA mini kit (Qiagen, Germany) and QIAamp DNeasy Blood and Tissue kit  
98 (Qiagen), according to the manufacturer's instructions.

99 **Design of universal and species-specific LAMP primers.** Entero-Common-LAMP primers  
100 for a simultaneous detection of *E. faecalis*, *E. faecium*, *E. hirae*, *E. gallinarum*, *E. avium*, *E.*  
101 *durans*, *E. cecorum*, and *E. columbae* were designed based on the published *rpoB* gene  
102 sequences of the *Enterococcus sp.* Additional LAMP primers, specific to *E. faecalis*, *E. faecium*,  
103 *E. hirae*, *E. gallinarum*, *E. avium*, *E. cecorum*, and *E. durans*, were designed to target specific  
104 variable regions by using Primer Explorer V4 software (Eiken Chemical Co., Ltd., Japan). The  
105 *malB* and *nuc* genes were selected as target genes for the detection of *E. coli* and *S. aureus*.  
106 These LAMP primers included the following: a forward outer primer F3; a reverse outer primer  
107 B3; a forward inner primer FIP (harboring the F2 region sequence at its 3'-end and the F1c  
108 region sequence at its 5'-end); a reverse inner primer BIP (harboring the B2 region sequence at  
109 its 3'-end and the B1c region sequence at its 5'-end); a forward loop primer LF; and a reverse  
110 loop primer LB. These primers recognized eight conserved regions within their target genes  
111 (Table 1).

112 **LAMP assays.** The LAMP reactions were performed in 25  $\mu$ l reaction volumes using a

113 Mmiso DNA amplification kit (Mmonitor, South Korea), in accordance with the manufacturer's  
114 instructions. The reaction mixtures contained 1 µl of bacterial genomic DNA, 2× reaction buffer,  
115 8 U of *Bst* DNA polymerase, 2.5 pmol of the outer primers (F3 and B3), 20 pmol of the forward  
116 and reverse inner primers (FIP and BIP), and 10 pmol of the loop primers (LF and LB). The  
117 LAMP assays were performed under isothermal conditions at 63°C for 30 min, followed by  
118 heating to 80°C for 5 min in a heating block, to terminate the reaction.

119 **The specificity and detection limits of LAMP.** The specificities of the optimized Entero-  
120 Common-LAMP, seven types of Entero-Specific-LAMP assays (i.e., *E. faecalis*-LAMP, *E.*  
121 *faecium*-LAMP, *E. hirae*-LAMP, *E. gallinarum*-LAMP, *E. avium*-LAMP, *E. durans*-LAMP, and  
122 *E. cecorum*-LAMP), *E. coli*-LAMP and *S. aureus*-LAMP assays were tested using all bacteria  
123 and viruses. Each LAMP reaction was performed using 25 ng of genomic DNA, at 63°C for 30  
124 min, and terminated by heating to 80°C for 5 min in a heating block. The assay detection limits  
125 were determined by testing 5-fold serial dilutions of bacterial DNA of *E. faecalis*, *E. faecium*, *E.*  
126 *hirae*, *E. gallinarum*, *E. avium*, *E. durans*, *E. cecorum*, *E. columbae*, *E. coli*, and *S. aureus*.

127 **PCR.** To compare the detection limits of the PCR and LAMP assays, the target genes from *E.*  
128 *faecalis*, *E. faecium*, *E. hirae*, *E. gallinarum*, *E. avium*, *E. durans*, *E. cecorum*, *E. columbae*, *E.*  
129 *coli*, and *S. aureus* were PCR-amplified in individual reactions. The reaction volume was 20 µl,  
130 and the reactions contained 2.5 mM each dNTP, 1.5 mM MgCl<sub>2</sub>, 10× reaction buffer, 1 U of Taq  
131 polymerase, 10 pM LAMP F3 and B3 primers, and 1 µl of serial dilutions of template DNA. The  
132 thermal cycler (Eppendorf, Germany) was set to the following PCR conditions: 94°C for 5 min;  
133 30 cycles of 94°C for 45 s, 55°C for 45 s, and 72°C for 45 s; with a final elongation at 72°C for 7  
134 min. For the Entero-common-PCR with *E. gallinarum* and *E. avium*-specific-PCR of *E. avium*,

135 the reactions conditions were as follows: an initial denaturation at 94°C for 5 min; 40 cycles of  
136 denaturation at 94°C for 1 min, annealing at 53°C for 1 min, and polymerization at 72°C for 1  
137 min; and an extension at 72°C for 7 min. The PCR products were analyzed under UV light after  
138 1.5% agarose gel electrophoresis.

139 **Detection of *Enterococcus sp.*, *E. coli*, and *S. aureus* in field samples.** The Entero-  
140 Common-LAMP, seven types of Entero-Specific-LAMP, *E. coli*-LAMP, and *S. aureus*-LAMP  
141 assays were used to analyze *E. faecalis*, *E. faecium*, *E. hirae*, *E. gallinarum*, *E. avium*, *E.*  
142 *cecorum*, *E. coli*, and *S. aureus* isolated from the liver, femur, and joint of broiler chickens with  
143 lameness. The isolated *Enterococcus sp.*, *E. coli*, and *S. aureus* strains were cultivated on tryptic  
144 soy agar. Genomic DNA was extracted and used in the nine types of LAMP assays to compare  
145 the results of *16S rRNA* sequencing, PCR, and LAMP assays.

146

## 147 **RESULTS AND DISCUSSION**

148 Several LAMP primer sets targeting specific genes (including *rpoB*, *ftsW*, *atpA*, *rpoA*, and  
149 *ddl* of *Enterococcus sp.*; *malB* of *E. coli*; and *nuc* of *S. aureus*) were screened using a DNA  
150 amplification kit according to the manufacturer's instructions. After the LAMP amplification  
151 under isothermal conditions, a color change from violet to sky blue indicated a positive reaction  
152 and the negative reaction remained violet. The sequences of the optimal LAMP primer sets are  
153 shown in Table 1. The specificity of optimal LAMP primer sets was examined using 25 ng of  
154 genomic DNA extracted from 28 different bacteria representing various genera and species, and  
155 three viruses. As shown in Fig. 1A, only in tubes containing 8 strains of *Enterococcus* genomic  
156 DNA and specific primers, the reaction mixture color changed from violet to sky blue, while the  
157 mixtures in other tubes remained violet. Likewise, the LAMP primers specific to *E. coli*, *S.*

158 *aureus*, *E. faecalis*, *E. faecium*, *E. hirae*, *E. gallinarum*, *E. avium*, *E. durans*, and *E. cecorum*  
159 yielded amplification products only in the reaction tubes that contained the specific target  
160 genomic DNA (Fig. 1C and E; Fig. 2A, C, E, G, I, K, and M). The positive reactions were also  
161 confirmed by the presence of ladder-like DNA bands on 1.5% TAE agarose gels (Fig. 1D and F;  
162 Fig. 2B, D, F, H, J, L, and N).

163 To compare the detection limits of the ten types of LAMP assays and that of conventional  
164 PCR, 5-fold serially diluted genomic DNA samples from *E. faecalis*, *E. faecium*, *E. hirae*, *E.*  
165 *gallinarum*, *E. avium*, *E. durans*, *E. cecorum*, *E. columbae*, *E. coli*, and *S. aureus* were used. The  
166 evaluation of the reaction detection limits was performed using primers LAMP F3 and B3 by  
167 PCR (Table 1). As shown in Fig. 3, the detection limits for the Entero-Common-LAMP assay  
168 were 2 pg/ $\mu$ l for *E. faecalis* and *E. durans*; 10 pg/ $\mu$ l for *E. faecium* and *E. columbae*; 400 fg/ $\mu$ l  
169 for *E. hirae*; 40 pg/ $\mu$ l for *E. gallinarum*; 4 pg/ $\mu$ l for *E. avium*; and 50 pg/ $\mu$ l for *E. cecorum*.  
170 Therein, the success of the LAMP reaction was detected with the naked eye and by agarose gel  
171 electrophoresis. On the other hand, the detection limits of PCR using the Entero-Common-  
172 LAMP primers F3 and B3 were 50 pg/ $\mu$ l for *E. faecalis*, *E. faecium*, *E. durans*, and *E. columbae*;  
173 1.25 ng/ $\mu$ l for *E. hirae*; 250 pg/ $\mu$ l for *E. gallinarum*; 10 pg/ $\mu$ l for *E. avium*; and 250 pg/ $\mu$ l for *E.*  
174 *cecorum* (Fig. 5A–H).

175 Seven types of Entero-Specific-LAMP assays detected the target genes from 400 fg/ $\mu$ l *E.*  
176 *faecalis*, *E. faecium*, *E. hirae*, and *E. avium* DNA, and 2 pg/ $\mu$ l *E. gallinarum*, *E. durans*, and *E.*  
177 *cecorum* DNA, under isothermal conditions, within 30 min, and assessment by the naked eye  
178 (Fig. 4). The detection limits of PCR with the Entero-Specific-LAMP primers F3 and B3 were  
179 250 pg/ $\mu$ l for *E. faecalis*, *E. faecium*, *E. gallinarum*, and *E. durans*; 50 pg/ $\mu$ l for *E. hirae* and *E.*



180 *cecorum*; and 6.25 ng/μl for *E. avium* (Fig. 5I–O). The detection limits for *E. coli* and *S. aureus*  
181 using LAMP assays were 2 pg/μl and 400 fg/μl DNA, respectively; however, the detection limits  
182 of PCR were 50 pg/μl for *E. coli* and 10 pg/μl for *S. aureus* (Fig. 5P and Q).

183 In conclusion, the sensitivity of the Entero-Common-LAMP and Entero-Specific-LAMP  
184 assays (for *E. faecalis*, *E. faecium*, *E. hirae*, *E. gallinarum*, *E. avium*, *E. durans*, and *E. cecorum*),  
185 and *E. coli*-LAMP and *S. aureus*-LAMP assays, was higher than that of conventional PCR for  
186 detecting pathogens associated with the lameness in broiler chicken.

187 In total, 140 bacterial strains isolated between 2016 and 2017 from the liver, femur, and joint  
188 of broiler chickens with lameness from the Animal and Plant Quarantine Agency in Korea were  
189 analyzed by LAMP assays, conventional PCR, and *16S rRNA* sequencing. The nine types of  
190 LAMP assays and PCR were congruent (100%). The agreement between the LAMP assays and  
191 *16S rRNA* sequencing was 92.6%, 83.9%, 95.2%, 0%, 100%, and 95% for the detection of *E.*  
192 *faecalis*, *E. faecium*, *E. hirae*, *E. gallinarum*, *E. avium*, and the avian pathogenic *E. coli*,  
193 respectively (Table 2).

194 Lameness with BCO is an important skeletal disease of broiler chicken (20). Some strains of  
195 *Enterococcus sp.*, avian pathogenic *E. coli*, and *S. aureus* are recognized as important BCO  
196 pathogens in the poultry industry, and are isolated from single or mixed cultures from BCO  
197 lesions (1, 28). In addition, *E. cecorum* and *E. hirae* are recovered from the joint and femur of  
198 lame birds (8, 11, 13, 25, 31). Enterococci, including *E. faecalis*, *E. faecium*, *E. avium*, *E. durans*,  
199 and *E. gallinarum*, are frequently isolated from the litter, feed, dead-shell, or 1-day-old chicks in  
200 poultry farms (2, 4). In one study, avian pathogenic *E. coli* was recovered from over 90% of  
201 bacteriologically tested chickens with lameness (5), and was the most frequently isolated  
202 bacterium from chickens with BCO (30). *S. aureus* is the major pathogen responsible for bone

203 and joint infections (16), and is also isolated from the litter, feeders, drinkers, and the air in  
204 poultry houses (17, 24, 26). *Enterococcus sp.*, avian pathogenic *E. coli*, and *S. aureus* are also  
205 responsible for significant financial losses worldwide. Therefore, they should be detected  
206 precisely and as early as possible to eradicate them and prevent their transmission. To achieve  
207 this, a simple and rapid diagnostic method for the detection of *Enterococcus sp.*, *E. coli*, and *S.*  
208 *aureus* in broiler chicken with lameness is necessary. At present, MALDI-TOF, VITEK, and *16S*  
209 *rRNA* sequencing analyses following bacterial isolation are routinely used for the identification  
210 of *Enterococcus sp.*, *E. coli*, and *S. aureus*. Although bacterial identification after isolation is the  
211 most reliable method, it is time-consuming and labor intensive. PCR-based methods are well  
212 optimized with respect to the sensitivity, specificity, and repeatability of the amplification of a  
213 target gene, and detect pathogens more quickly than bacterial culture. However, these methods  
214 require special equipment, such as thermal cyclers and skilled labor, and PCR amplicons must be  
215 analyzed by electrophoresis (22). By contrast, LAMP is a simple, rapid, efficient, and cost-  
216 effective method, which uses a water bath or block heater to amplify the target DNA under  
217 isothermal conditions. The success of the LAMP amplification reaction may be assessed by the  
218 naked eye, either as a turbidity change (white precipitate formation), or through a color change  
219 (from violet to sky blue), without the need for electrophoretic analysis.

220 In the current study, we developed different types of LAMP assays to detect *Enterococcus*  
221 *sp.*, *E. coli*, and *S. aureus*. We designed ten sets of primers (six primers each) targeting the *rpoB*  
222 gene from eight common *Enterococcus* species; seven *Enterococcus*-specific genes, i.e., a cell  
223 surface protein gene of *E. faecalis*, a cell wall protein gene of *E. faecium*, the *ftsW* gene of *E.*  
224 *hirae*, the *atpA* gene of *E. gallinarum*, the *ddl* gene of *E. avium*, an amino acid permease gene of  
225 *E. durans*, and the *rpoA* of *E. cecorum*; the *malB* gene of *E. coli*; and the *nuc* gene of *S. aureus*.

226 We then tested the reaction detection limits and specificity in LAMP reactions performed at 63°C  
227 for 30 min.

228 The detection limit of the Entero-Common-LAMP assay was between 50 pg/μl and 400 fg/μl,  
229 whereas the detection limit of the conventional PCR using the Entero-Common-LAMP primers  
230 F3 and B3 was between 1.25 ng/μl and 10 pg/μl. This demonstrated that the Entero-Common-  
231 LAMP assay was 5–10 times more sensitive than the Entero-common-PCR. Specifically, in the  
232 case of *E. hirae*, the detection limits of Entero-Common-LAMP assay and Entero-common-PCR  
233 were 400 fg/μl and 1.25 ng/μl, respectively, which indicated that LAMP was 3,125 times more  
234 sensitive than the PCR reaction. Further, seven types of Entero-Specific-LAMP assays detected  
235 the target genes from 400 fg/μl *E. faecalis*, *E. faecium*, *E. hirae*, and *E. avium* DNA; and from 2  
236 pg/μl *E. gallinarum*, *E. durans*, and *E. cecorum* DNA. By contrast, the detection limits of PCR  
237 with the Entero-Specific-LAMP primers F3 and B3 were 250 pg/μl, for *E. faecalis*, *E. faecium*, *E.*  
238 *gallinarum*, and *E. durans*; 50 pg/μl, for *E. hirae* and *E. cecorum*; and 6.25 ng/μl, for *E. avium*.  
239 The sensitivity of the Entero-Specific-LAMP assays was therefore 25–625 times higher than that  
240 of the Entero-specific-PCR reactions. Above all, the sensitivity of the LAMP assay for the  
241 detection of *E. avium* was 15,625 times higher than that of the PCR reaction. The detection limits  
242 of *E. coli*-LAMP and *S. aureus*-LAMP were 2 pg/μl and 400 fg/μl, respectively; however, the  
243 detection limits of the PCR reactions were 50 pg/μl for *E. coli* and 10 pg/μl for *S. aureus*.  
244 Furthermore, the sensitivities of the *E. faecalis*-LAMP and *S. aureus*-LAMP assays were  
245 superior to those reported previously (9, 14-15, 27, 32). Collectively, these observations  
246 indicated that the sensitivity of the ten LAMP assays was much higher than that of conventional  
247 PCR and of previously devised LAMP assays.

248 The specificity tests for the Entero-Common-LAMP, the seven types of Entero-Specific-  
249 LAMP, and the *E. coli*-LAMP and *S. aureus*-LAMP assays revealed that the target genes were  
250 successfully detected without cross-reactivity with other avian bacterial and viral pathogens.

251 The practical application of the LAMP assays was evaluated using 140 samples, and the  
252 outcomes were compared with those of PCR and *16S rRNA* sequencing. The seven LAMP assays  
253 and PCR reactions accurately identified all samples of different *Enterococcus* isolates (including  
254 *E. faecalis*, *E. faecium*, *E. hirae*, *E. avium*, and *E. cecorum*) at the genus and species level.  
255 Further, the LAMP and PCR assays were 100% congruent for both *S. aureus* and *E. coli*  
256 detection. By contrast, the results of *16S rRNA* sequencing indicated 92.6%, 83.9%, 95.2%, and  
257 100% agreement in the identification of *E. faecalis*, *E. faecium*, *E. hirae*, and *E. avium*,  
258 respectively. Strikingly, *E. gallinarum* was not identified by using *16S rRNA* sequencing, while  
259 the identification rate using *E. gallinarum*-LAMP and *E. gallinarum*-PCR was 100%. This  
260 indicated that *16S rRNA* sequencing was less efficient in identifying the *Enterococcus* species  
261 than LAMP assays and conventional PCR. Finally, VITEK 2 system was used for the detection  
262 of three *E. cecorum* and ten *S. aureus* strains, and the congruence of the LAMP assays and  
263 VITEK 2 was 100% for both bacteria (data not shown). The results of the nine types of LAMP  
264 assays were also confirmed by sequencing. This indicated that the LAMP assays yielded accurate  
265 results within 30 min compared with those generated by *16S rRNA* sequencing (18 to 24 h),  
266 VITEK 2 (18 to 24 h), and conventional PCR (3 to 4 h). Further, the high specificity and  
267 amplification ability of the ten types of LAMP assays allowed an easy and rapid visualization of  
268 the amplification success without the need for gel electrophoresis.

269 We presented the first-ever Entero-Common-LAMP assay for a simultaneous detection of  
270 eight *Enterococcus sp.* such as *E. faecalis*, *E. faecium*, *E. hirae*, *E. gallinarum*, *E. avium*, *E.*

271 *durans*, *E. cecorum*, and *E. columbae*, and seven types of Entero-Specific-LAMP assays for a  
272 specific identification of seven *Enterococcus sp.* such as *E. faecalis*, *E. faecium*, *E. hirae*, *E.*  
273 *gallinarum*, *E. avium*, *E. durans*, and *E. cecorum*, using new target genes (10).

274 *Enterococcus sp.*, *E. coli*, and *S. aureus* strains that cause lameness are widely found in  
275 warm-blooded animals and several other natural habitats, but are difficult to control in animals.  
276 Furthermore, *E. faecalis*, *E. faecium*, and *S. aureus* found in human and processed foods are  
277 major pathogens in hospital-acquired and community-acquired infection (3, 18).

278 In conclusion, the Entero-Common-LAMP, seven types of Entero-Specific-LAMP assays, *E.*  
279 *coli*-LAMP, and *S. aureus*-LAMP established herein have the potential to become a very useful  
280 tool for the prevention of disease transmission or outbreaks in the field or in resource-limited  
281 environments.

282

## 283 **ACKNOWLEDGMENTS**

284 This work was supported by a research grant (B-1543084-2016-17-04) from the Animal and Plant  
285 Quarantine Agency (QIA), Ministry of Agriculture, Food and Rural Affairs, the Republic of Korea.

286

## 287 **REFERENCES**

- 288 1. Braga JF, Silva CC, Teixeira MP, Martins NR, Ecco R. 2016. Vertebral osteomyelitis associated  
289 with single and mixed bacterial infection in broilers. *Avian Pathol.* 45:640-648.
- 290 2. Cortes CR, Téllez Isaias G, Lopez Cuello C, Villaseca-Flores JM, Anderson RC, Eslava Campos  
291 C. 2004. Bacterial isolation rate from fertile eggs, hatching eggs, and neonatal broilers with yolk  
292 sac infection. *Rev Latinoam Microbiol.* 46:12–16.
- 293 3. Debnam AL, Jackson CR, Avellaneda GE, Barrett JB, Hofacre CL. 2005. Effect of growth

- 294           promotant usage on enterococci species on a poultry farm. *Avian Dis.* 49:361-365.
- 295           4. Deeming DC. 2005. Yolk sac, body dimensions and hatchling quality of ducklings, chicks and  
296           poult. *British Poultry Science.* 46:560–564.
- 297           5. Dinev I. 2009. Clinical and morphological investigations on the prevalence of lameness  
298           associated with femoral head necrosis in broilers. *Br Poult Sci.* 50:284-290.
- 299           6. Goto M, Honda, E, Ogura, A, Nomoto, A, Hanaki, K. 2009. Colorimetric detection of loop-  
300           mediated isothermal amplification reaction by using hydroxy naphthol blue. *Biotechniques*  
301           46:167-172.
- 302           7. Jiang T, Mandal RK, Wideman RF Jr, Khatiwara A, Pevzner I, Min Kwon Y. 2015. Molecular  
303           survey of bacterial communities associated with bacterial chondronecrosis with osteomyelitis  
304           (BCO) in broilers. *PLoS One.* 10:e0124403.
- 305           8. Jung A, Rautenschlein S. 2014. Comprehensive report of an *Enterococcus cecorum* infection in a  
306           broiler flock in Northern Germany. *BMC Vet Res.* 10:311.
- 307           9. Kato H, Yoshida A, Ansai T, Watari H, Notomi T, Takehara T. 2007. Loop-mediated isothermal  
308           amplification method for the rapid detection of *Enterococcus faecalis* in infected root canals.  
309           *Oral Microbiol Immunol.* 22:131-5.
- 310           10. Ke D, Picard FJ, Martineau F, Ménard C, Roy PH, Ouellette M, Bergeron MG. 1999.  
311           Development of a PCR assay for rapid detection of enterococci. *J Clin Microbiol.* 37:3497-503.
- 312           11. Kense MJ, Landman WJ. 2011. *Enterococcus cecorum* infections in broiler breeders and their  
313           offspring: molecular epidemiology. *Avian Pathol.* 40:603-12.
- 314           12. Kestin SC, Knowles TG, Tinch AE, Gregory NG. 1992. Prevalence of leg weakness in broiler  
315           chickens and its relationship with genotype. *Vet Rec.* 131:190-194.
- 316           13. Kolbjørnsen Ø, David B, Gilhuus M. 2011. Bacterial osteomyelitis in a 3-week-old broiler  
317           chicken associated with *Enterococcus hirae*. *Vet Pathol.* 48:1134-1137.

- 318 14. Lim KT, Teh CS, Thong KL. 2013. Loop-mediated isothermal amplification assay for the rapid  
319 detection of *Staphylococcus aureus*. Biomed Res Int. 2013:895816.
- 320 15. Martzy R, Kolm C, Brunner K, Mach RL, Krska R, Šinkovec H, Sommer R, Farnleitner AH,  
321 Reischer GH. 2017. A loop-mediated isothermal amplification (LAMP) assay for the rapid  
322 detection of *Enterococcus spp.* in water. Water Res. 122:62-69.
- 323 16. McCullagh JJ, McNamee PT, Smyth JA, Ball HJ. 1998. The use of pulsed field gel  
324 electrophoresis to investigate the epidemiology of *Staphylococcus aureus* infection in  
325 commercial broiler flocks. Vet Microbiol. 63:275-81.
- 326 17. McNamee PT, McCullagh JJ, Rodgers JD, Thorp BH, Ball HJ, Connor TJ, McConaghy D, Smyth  
327 JA. 1999. Development of an experimental model of bacterial chondronecrosis with  
328 osteomyelitis in broilers following exposure to *Staphylococcus aureus* by aerosol, and  
329 inoculation with chicken anaemia and infectious bursal disease viruses. Avian Pathol. 28:26-35.
- 330 18. McNamee PT, Smyth JA. 2000. Bacterial chondronecrosis with osteomyelitis ('femoral head  
331 necrosis') of broiler chickens: a review. Avian Pathol. 29:253-270.
- 332 19. Nagamine, K., Hase, T., Notomi, T. 2002. Accelerated reaction by loop-mediated isothermal  
333 amplification using loop primers. Mol Cell Probes. 16:223-229.
- 334 20. Nairn ME, Watson AR. 1972. Leg weakness of poultry: a clinical and pathological  
335 characterisation. Aust Vet J. 48:645-56.
- 336 21. Notomi T, Okayama H, Masubuchi H, Yonekawa T, Watanabe K, Amino N, Hase T. 2000. Loop-  
337 mediated isothermal amplification of DNA. Nucleic Acids Res. 28:e63.
- 338 22. Peters RP, van Agtmael MA, Danner SA, Savelkoul PH, Vandenbroucke-Grauls CM. 2004. New  
339 developments in the diagnosis of bloodstream infections. Lancet Infect Dis. 4:751-60.
- 340 23. Rodgers JD, McCullagh JJ, McNamee PT, Smyth JA, Ball HJ. 1999. Comparison of  
341 *Staphylococcus aureus* recovered from personnel in a poultry hatchery and in broiler parent

- 342 farms with those isolated from skeletal disease in broilers. *Vet Microbiol.* 69:189-198.
- 343 24. Sauter EA, Petersen CF, Steele EE, Parkinson JF, Dixon JE, Stroh RC. 1981. The airborne  
344 microflora of poultry houses. *Poult Sci.* 60:569-574.
- 345 25. Stalker MJ, Brash ML, Weisz A, Ouckama RM, Slavic D. 2010. Arthritis and osteomyelitis  
346 associated with *Enterococcus cecorum* infection in broiler and broiler breeder chickens in  
347 Ontario, Canada. *J Vet Diagn Invest.* 22:643-645.
- 348 26. Thompson JK, Gibbs PA, Patterson JT. 1980. *Staphylococcus aureus* in commercial laying flocks:  
349 incidence and characteristics of strains isolated from chicks, pullets and hens in an integrated  
350 commercial enterprise. *Br Poult Sci.* 21:315-330.
- 351 27. Wang XR, Wu LF, Wang Y, Ma YY, Chen FH, Ou HL., 2015. Rapid detection of *Staphylococcus*  
352 *aureus* by loop-mediated isothermal amplification. *Appl Biochem Biotechnol.* 175:882-891.
- 353 28. Wideman RF Jr, Hamal KR, Stark JM, Blankenship J, Lester H, Mitchell KN, Lorenzoni G,  
354 Pevzner I. 2012. A wire-flooring model for inducing lameness in broilers: evaluation of  
355 probiotics as a prophylactic treatment. *Poult Sci.* 91:870-883.
- 356 29. Wideman RF Jr. 2016. Bacterial chondronecrosis with osteomyelitis and lameness in broilers: a  
357 review. *Poult Sci.* 95:325-344.
- 358 30. Wijesurendra DS, Chamings AN, Bushell RN, Rourke DO, Stevenson M, Marendia MS,  
359 Noormohammadi AH, Stent A. 2017. Pathological and microbiological investigations into cases  
360 of bacterial chondronecrosis and osteomyelitis in broiler poultry. *Avian Pathol.* 46:683-694.
- 361 31. Wood AM, MacKenzie G, McGiliveray NC, Brown L, Devriese LA, Baele M. 2002. Isolation of  
362 *Enterococcus cecorum* from bone lesions in broiler chickens. *Vet Rec.* 150:27.
- 363 32. Zhao X, Li Y, Park M, Wang J, Zhang Y, He X, Forghani F, Wang L, Yu G, Oh DH. 2013. Loop-  
364 mediated isothermal amplification assay targeting the femA gene for rapid detection of  
365 *Staphylococcus aureus* from clinical and food samples. *J Microbiol Biotechnol.* 23:246-50.



1 **FIGURE LEGENDS**

2

3 (A)

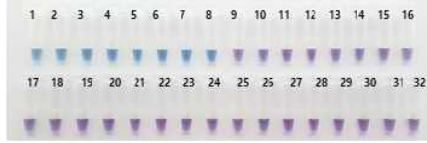

(B)

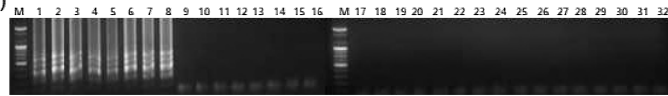

4

5

1: *E.faecalis*, 2: *E.faecium*, 3: *E.hirae*, 4: *E.gallinarum*, 5: *E.avium*, 6: *E.durans*, 7: *E.cecorum*, 8: *E.columbae*, 9: *E.mundtii*, 10: *E.saccharolyticus*, 11: *E.casseliflavus*, 12: *E.sulfureus*, 13: *S.aureus*, 14: *S.cohnii*, 15: *S.xyloso*, 16: *S.lentus*, 17: *S.hominis*, 18: *S.epidermidis*, 19: *O.rhinotracheale*, 20: *P.multocida*, 21: *M.gallisepticum*, 22: *M.synoviae*, 23: *B.cereus*, 24: *C.coli*, 25: *C.perfringens*, 26: *C.jejuni*, 27: *E.coli*, 28: *S.enteritidis*, 29: MDV, 30: CAV, 31: REV, 32: Negative control, M: Size marker

6

7 (C)

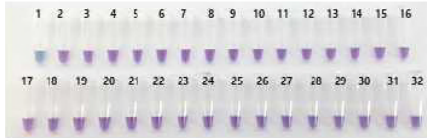

(D)

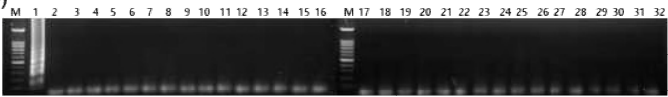

8

9

1: *E.coli*, 2: *E.faecalis*, 3: *E.faecium*, 4: *E.hirae*, 5: *E.gallinarum*, 6: *E.avium*, 7: *E.durans*, 8: *E.cecorum*, 9: *E.columbae*, 10: *E.mundtii*, 11: *E.saccharolyticus*, 12: *E.casseliflavus*, 13: *E.sulfureus*, 14: *S.aureus*, 15: *S.cohnii*, 16: *S.xyloso*, 17: *S.lentus*, 18: *S.hominis*, 19: *S.epidermidis*, 20: *O.rhinotracheale*, 21: *P.multocida*, 22: *M.gallisepticum*, 23: *M.synoviae*, 24: *B.cereus*, 25: *C.coli*, 26: *C.perfringens*, 27: *C.jejuni*, 28: *S.enteritidis*, 29: MDV, 30: CAV, 31: REV, 32: Negative control, M: Size marker

10

11 (E)

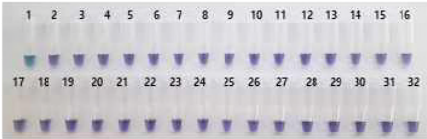

(F)

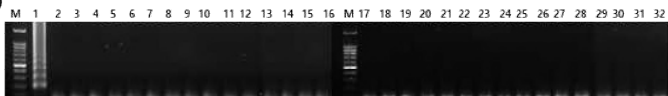

12

13

1: *S.aureus*, 2: *E.faecalis*, 3: *E.faecium*, 4: *E.hirae*, 5: *E.gallinarum*, 6: *E.avium*, 7: *E.durans*, 8: *E.cecorum*, 9: *E.columbae*, 10: *E.mundtii*, 11: *E.saccharolyticus*, 12: *E.casseliflavus*, 13: *E.sulfureus*, 14: *E.coli*, 15: *S.cohnii*, 16: *S.xyloso*, 17: *S.lentus*, 18: *S.hominis*, 19: *S.epidermidis*, 20: *O.rhinotracheale*, 21: *P.multocida*, 22: *M.gallisepticum*, 23: *M.synoviae*, 24: *B.cereus*, 25: *C.coli*, 26: *C.perfringens*, 27: *C.jejuni*, 28: *S.enteritidis*, 29: MDV, 30: CAV, 31: REV, 32: Negative control, M: Size marker

14

15 **FIG 1** Specificity of the Entero-Common-LAMP, *E. coli*-LAMP, and *S. aureus*-LAMP assays. (A) Entero-Common-  
16 LAMP; (C) *E. coli*-LAMP; and (E) *S. aureus*-LAMP. A color change from violet to sky blue indicated a LAMP-  
17 positive reaction, while the color of a LAMP-negative reaction mixture remained violet. The LAMP products were  
18 also resolved by 1.5% agarose gel electrophoresis: (B) Entero-Common-LAMP; (D) *E. coli*-LAMP; and (F) *S.*  
19 *aureus*-LAMP.

20

21

22

23

24

25

26

1 **FIGURE LEGENDS**

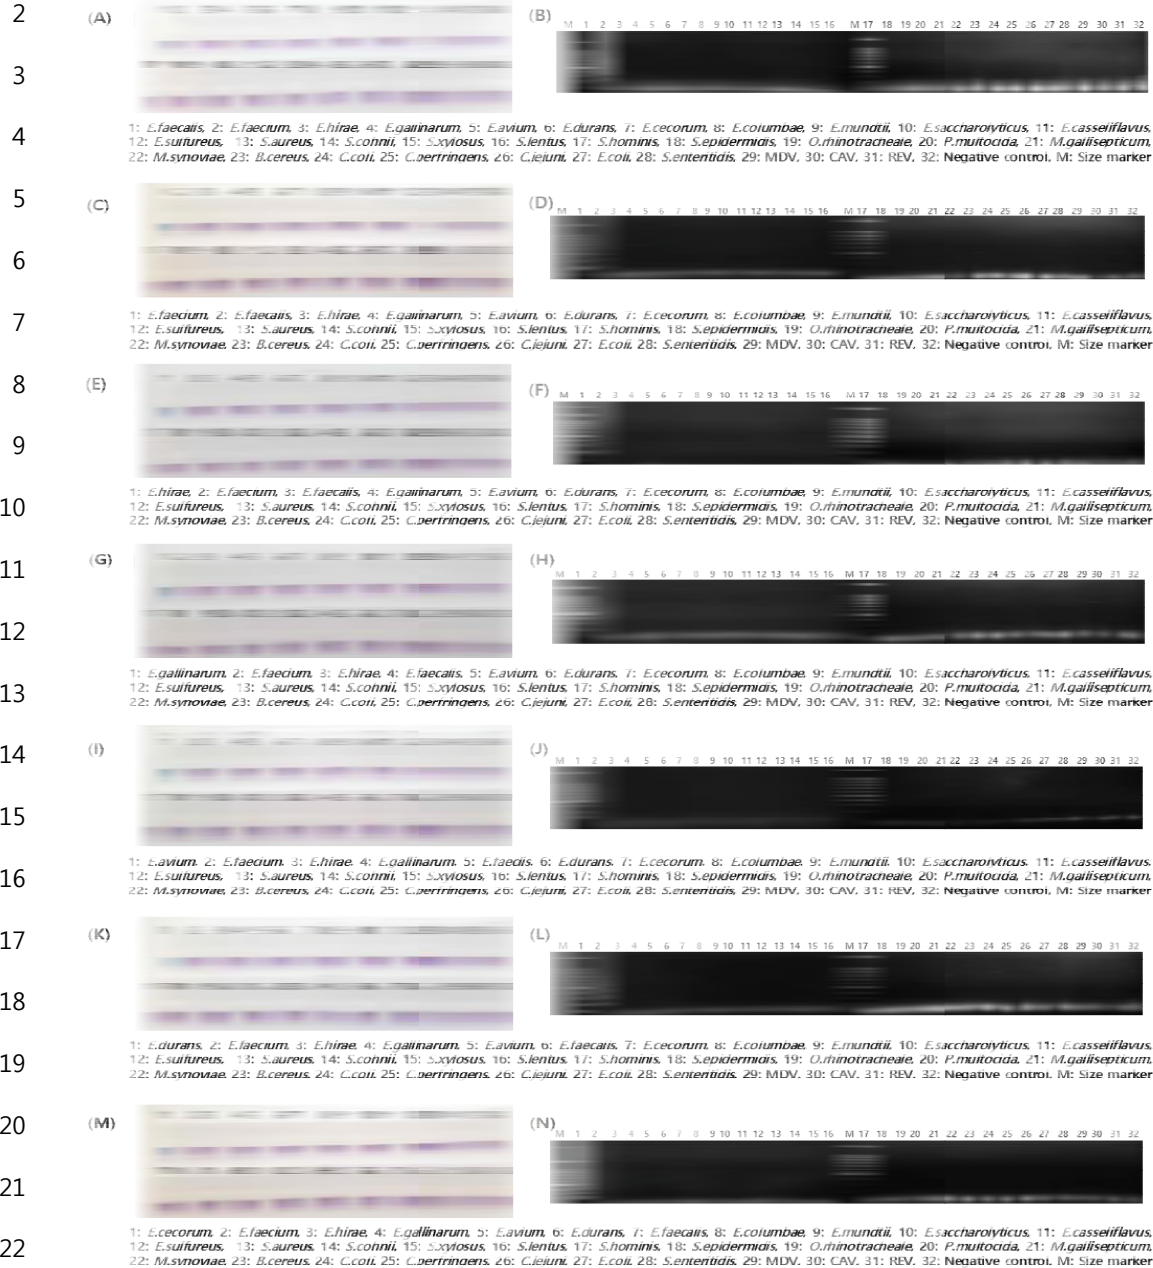

23 **FIG 2** Specificity of seven types of the Entero-Specific-LAMP assays. (A) *E. faecalis*-LAMP; (C)  
24 *E. faecium*-LAMP; (E) *E. hirae*-LAMP; (G) *E. gallinarum*-LAMP; (I) *E. avium*-LAMP; (K)  
25 *E. durans*-LAMP; and (M) *E. cecorum*-LAMP. In these assays, a color change from violet to sky blue was observed

26 only in the tubes containing the target genomic DNA. The products of the LAMP assays were resolved by 1.5%  
27 agarose gel electrophoresis: (B) *E. faecalis*-LAMP; (D) *E. faecium*-LAMP; (F) *E. hirae*-LAMP; (H) *E. gallinarum*-  
28 LAMP; (J) *E. avium*-LAMP; (L) *E. durans*-LAMP; and (N) *E. cecorum*-LAMP.

1 **FIGURE LEGENDS**

2

3

4

5

6

7

8

9

10

11

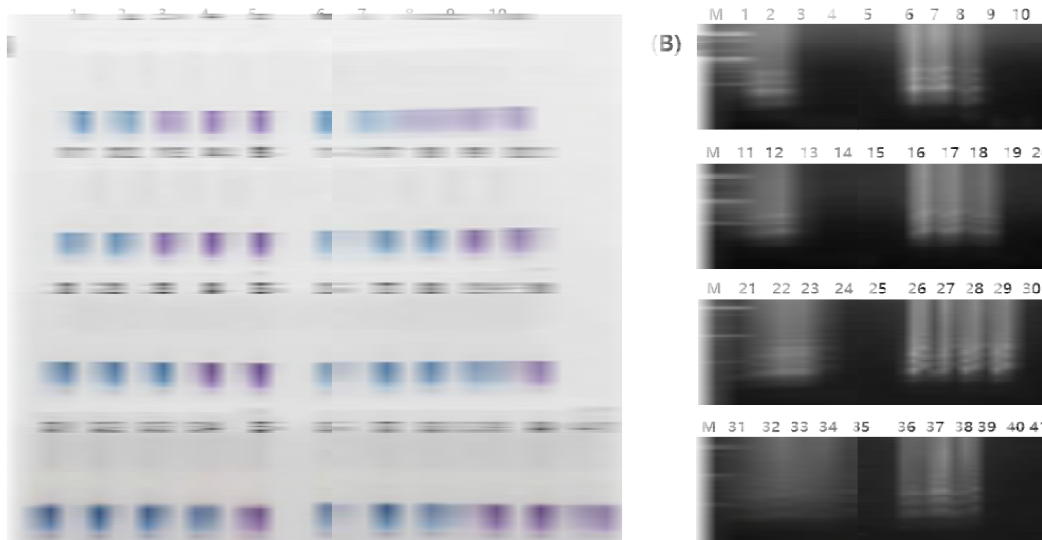

12 **FIG 3** Detection limits of the Entero-Common-LAMP assay. (A) Naked-eye visualization of the LAMP products.

13 The color of LAMP-positive reactions turned sky blue, while the color of LAMP-negative reactions remained violet.

14 (B) Agarose gel electrophoresis of LAMP products. Lane M, 100 bp DNA marker. *E. faecalis* genomic DNA

15 (lanes/tubes): 1, 10 pg/μl; 2, 2 pg/μl; 3, 400 fg/μl; 4, 80 fg/μl; and 5, 16 fg/μl. *E. faecium* genomic DNA

16 (lanes/tubes): 6, 50 pg/μl; 7, 10 pg/μl; 8, 2 pg/μl; 9, 400 fg/μl; and 10, 80 fg/μl. *E. durans* genomic DNA

17 (lanes/tubes): 11, 10 pg/μl; 12, 2 pg/μl; 13, 400 fg/μl; 14, 80 fg/μl; and 15, 16 fg/μl. *E. hirae* genomic DNA

18 (lanes/tubes): 16, 10 pg/μl; 17, 2 pg/μl; 18, 400 fg/μl; 19, 80 fg/μl; and 20, 16 fg/μl. *E. columbae* genomic DNA

19 (lanes/tubes): 21, 250 pg/μl; 22, 50 pg/μl; 23, 10 pg/μl; 24, 2 pg/μl; and 25, 400 fg/μl. *E. avium* genomic DNA

20 (lanes/tubes): 26, 500 pg/μl; 27, 100 pg/μl; 28, 20 pg/μl; 29, 4 pg/μl; and 30, 800 fg/μl. *E. gallinarum* genomic DNA

21 (lanes/tubes): 31, 5 ng/μl; 32, 1 ng/μl; 33, 200 pg/μl; 34, 40 pg/μl; and 35, 8 pg/μl. *E. cecorum* genomic DNA

22 (lanes/tubes): 36, 1.25 ng/μl; 37, 250 pg/μl; 38, 50 pg/μl; 39, 10 pg/μl; and 40, 2 pg/μl. Lane 41, negative control.

1 **FIGURE LEGENDS**

2

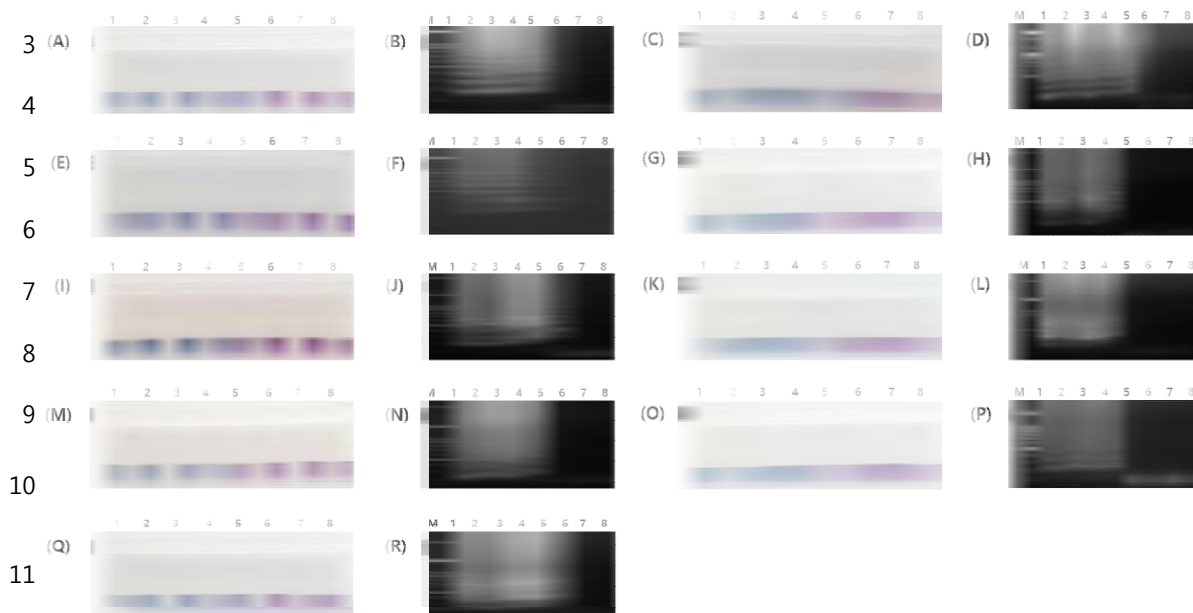

12 **FIG 4** Detection limits of seven types of the Entero-Specific-LAMP, *E. coli*-LAMP, and *S. aureus*-LAMP assays.  
13 Visual inspection of LAMP products for the detection of *E. faecalis* (A), *E. faecium* (C), *E. hirae* (E), *E. gallinarum*  
14 (G), *E. avium* (I), *E. durans* (K), *E. cecorum* (M), *E. coli* (O), and *S. aureus* (Q) under natural light. Agarose gel  
15 electrophoresis of LAMP products from different LAMP assays: *E. faecalis*-LAMP (B), *E. faecium*-LAMP (D), *E.*  
16 *hirae*-LAMP (F), *E. gallinarum*-LAMP (H), *E. avium*-LAMP (J), *E. durans*-LAMP (L), *E. cecorum*-LAMP (N), *E.*  
17 *coli*-LAMP (P), and *S. aureus*-LAMP (R). Lane M, 100 bp DNA marker; lanes (tubes): 1, 250 pg/μl; 2, 50 pg/μl; 3,  
18 10 pg/μl; 4, 2 pg/μl; 5, 400 fg/μl; 6, 80 fg/μl; 7, 16 fg/μl; and 8, negative control.

1 **FIGURE LEGENDS**

2

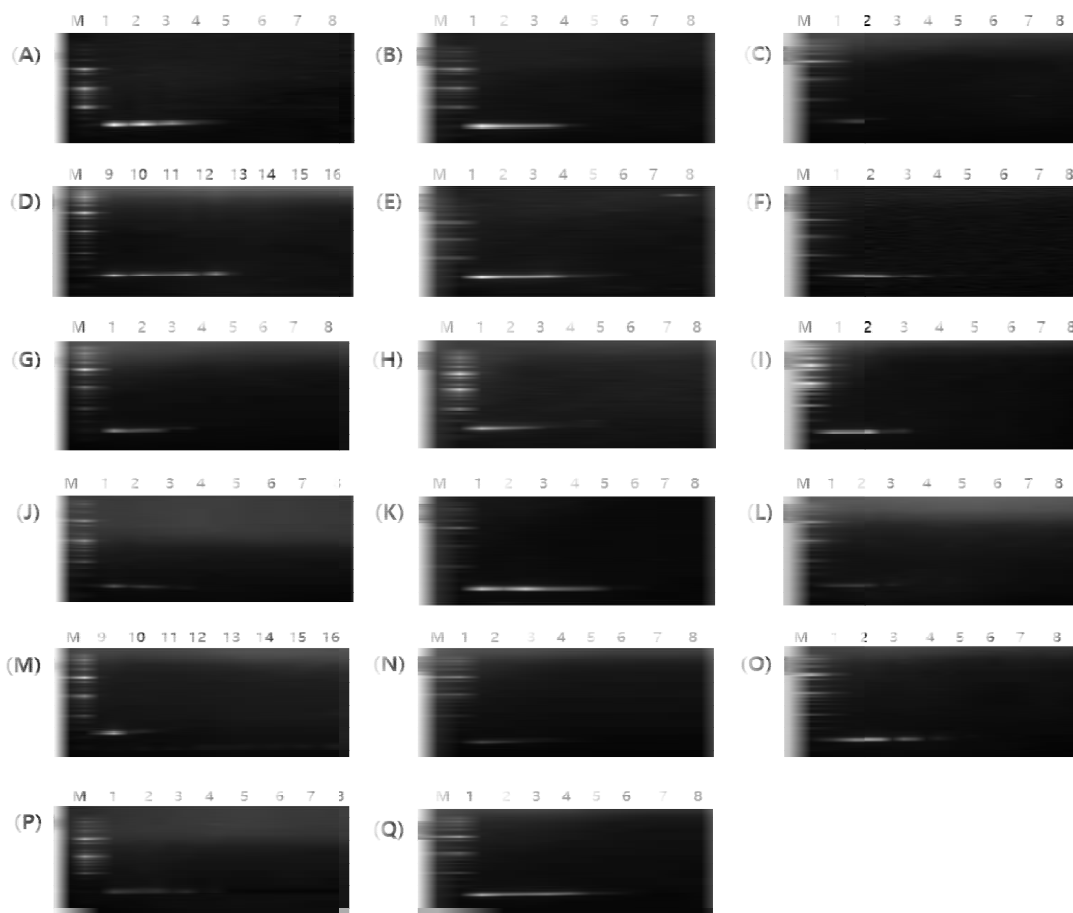

3

4 **FIG 5** Electrophoretic analysis of PCR products to compare the detection limits of conventional PCR and LAMP  
5 assays. PCR was performed to detect *E. faecalis* (A), *E. faecium* (B), *E. hirae* (C), *E. gallinarum* (D), *E. avium* (E),  
6 *E. durans* (F), *E. cecorum* (G), and *E. columbae* (H), using universal primers F3 and B3 for *Enterococcus* species.  
7 Gels in (I–Q) show resolved PCR products of specific target genes from *E. faecalis* (I), *E. faecium* (J), *E. hirae* (K),  
8 *E. gallinarum* (L), *E. avium* (M), *E. durans* (N), *E. cecorum* (O), *E. coli* (P), and *S. aureus* (Q). Lanes: M, 100 bp  
9 DNA marker; 1, 6.25 ng/μl; 2, 1.25 ng/μl; 3, 250 pg/μl; 4, 50 pg/μl; 5, 10 pg/μl; 6, 2 pg/μl; 7, 400 fg/μl; 9, 31.3  
10 ng/μl; 10, 6.25 ng/μl; 11, 1.25 ng/μl; 12, 250 pg/μl; 13, 50 pg/μl; 14, 10 pg/μl; 15, 2 pg/μl; 8 and 16, negative  
11 control.

1 TABLES

2 TABLE 1 LAMP primers for the detection of *Enterococcus sp.*, *E. coli*, and *S. aureus*

| Primer set no. | LAMP assay           | Target bacterium               | Target gene          | Primer      | Sequence (5'–3')                                                |
|----------------|----------------------|--------------------------------|----------------------|-------------|-----------------------------------------------------------------|
| 1              | Entero-Common-LAMP   | <i>Enterococcus sp.</i>        | <i>rpoB</i>          | F3          | GAAGCTGGCGATGAATTATC                                            |
|                |                      |                                |                      | B3          | CCTAATGGRTTCAACATGATATC                                         |
|                |                      |                                |                      | FIP(F1c+F2) | TGACGTCCGGCCATTTTATCCCAGGYGTAAAYATGTTAGTTCCG                    |
|                |                      |                                |                      | BIP(B1c+B2) | AATAAAGGGGTTGTTTCCCCTATGGTGTTCGTCWGGTAAGAA                      |
|                |                      |                                |                      | LF          | CCTTCATGGATTTTACGTTTTTGAACG                                     |
|                |                      |                                |                      | LB          | ATGCCGGAAGAAGATATGCC                                            |
| 2              | Entero-Specific-LAMP | <i>Enterococcus faecalis</i>   | Cell surface protein | F3          | GAA GGA AAA ACG GTC CAA GA                                      |
|                |                      |                                |                      | B3          | TTC CTT TAC CAC TTC TGG TG                                      |
|                |                      |                                |                      | FIP(F1c+F2) | ATT TGT TGT CTG TGT TTT ATC TTC ACA GCG TCA ATT AGC AGA AAC C   |
|                |                      |                                |                      | BIP(B1c+B2) | GAG AAG ATG GAG TGG TTT CTT TCC GCT TCA ACA AAT AAA TAG GCT T   |
|                |                      |                                |                      | LF          | GCG ATC GGT TTT CTA TTT GTT GCA C                               |
|                |                      |                                |                      | LB          | ATT AGC TAG CAA AGA TTC GCA GCA                                 |
| 3              | Entero-Specific-LAMP | <i>Enterococcus faecium</i>    | Cell wall protein    | F3          | ATG TCT AAT TGG CTA CAC AGG                                     |
|                |                      |                                |                      | B3          | TTG GAC ATC TGC CTT TGA AT                                      |
|                |                      |                                |                      | FIP(F1c+F2) | CTG TGT CAG ATT CTC ATT GAT TGG CGG TAC GCA AAT GAA ATT ATT T   |
|                |                      |                                |                      | BIP(B1c+B2) | ATC ATA CAT TGA CAG ATA AAG AGC TTG CAA TGT CTG TTC TTT TTG TGC |
|                |                      |                                |                      | LF          | ATC AAT ATC TGT CTC TCC ACC CCA                                 |
|                |                      |                                |                      | LB          | GCG ATT ACA GAT CTT ACC GCT CG                                  |
| 4              | Entero-Specific-LAMP | <i>Enterococcus hirae</i>      | <i>ftsW</i>          | F3          | TAG AAA TGA CCG CAG TGT TC                                      |
|                |                      |                                |                      | B3          | TAA GAT CAA GCT AGC AAT CGC                                     |
|                |                      |                                |                      | FIP(F1c+F2) | CTC CCG CAA TTT TAG GTT GAA CTT CAT ATA CCA GTA TTG ATC GT      |
|                |                      |                                |                      | BIP(B1c+B2) | CTG ATG ATT TTA GCT ATT GCT GGA AAT TAT CAG CCC TTT TTT AAT GGG |
|                |                      |                                |                      | LF          | CAA AAC AAG CAC GGC GAT TCC                                     |
|                |                      |                                |                      | LB          | GCT ATC TTT TGG GCT GCA GCT AT                                  |
| 5              | Entero-Specific-LAMP | <i>Enterococcus gallinarum</i> | <i>atpA</i>          | F3          | TGA AGG TGA CAA AGT AAA ACG T                                   |
|                |                      |                                |                      | B3          | CTT TCA ATC CAG TCT GCA TTG                                     |
|                |                      |                                |                      | FIP(F1c+F2) | CAT CGA TTG GTT GTC CTA ACG GAA AAA TCA TGG AAG TTC CTG TTG     |
|                |                      |                                |                      | BIP(B1c+B2) | AGG TCC AAT CGA TAC AGA TAA ATC GAA ACG GAT TTA CGT TGC         |

|    |                       |                              |                     |             |                                                                 |
|----|-----------------------|------------------------------|---------------------|-------------|-----------------------------------------------------------------|
| 6  |                       | <i>Enterococcus avium</i>    | <i>ddl</i>          |             | ATA ACA                                                         |
|    |                       |                              |                     | LF          | CAC TAC TCG TCC AAT CAA GGC ATC                                 |
|    |                       |                              |                     | LB          | GGT AGA AGC AGC TGC ACC T                                       |
|    |                       |                              |                     | F3          | TTT GTC AAA CCG GCG AAT A                                       |
|    |                       |                              |                     | B3          | AAT GCT TCT TCC TTT ACG ACC                                     |
|    |                       |                              |                     | FIP(F1c+F2) | AGC TCT TGA ATC ATA GCG ATA AGC GGG CTC TAG CGT AGG AAT TTC ACG |
|    |                       |                              |                     | BIP(B1c+B2) | TTA GTT GAG CAA GGC ATC GAT GCT ATG TCG TCC GCA CAT CGT CAT T   |
|    |                       |                              |                     | LF          | CAA TGC GTT TTG CAG TTC TTC GC                                  |
| 7  |                       | <i>Enterococcus durans</i>   | Amino acid permease | LB          | GTG AGA TTG AAG TTG CGG TTT TAG GC                              |
|    |                       |                              |                     | F3          | ATA ACA CCA GAA GCA TCT GAA G                                   |
|    |                       |                              |                     | B3          | TTA TGA TGG GTG GCT AGG T                                       |
|    |                       |                              |                     | FIP(F1c+F2) | ACA GTC GTT TAT CTA TTG ATC AAC CAG CAT TGA GAT TCC CTG CAA TTT |
|    |                       |                              |                     | BIP(B1c+B2) | ACA AAA CTC AAG CCC AAA ATA AAT GGC TGG TGA GAT GAA GCA T       |
|    |                       |                              |                     | LF          | GTG TTC CTA AAA ACA CTG CCT ATC GAT                             |
|    |                       |                              |                     | LB          | TGC TTT CGG TAG GTC CTT TTC TG                                  |
|    |                       |                              |                     | F3          | CCT TAA AAT TGT ACG GAT CTG AAG                                 |
| 8  |                       | <i>Enterococcus cecorum</i>  | <i>rpoA</i>         | B3          | TTC GTC AGC TTG AAC GTA A                                       |
|    |                       |                              |                     | FIP(F1c+F2) | GTT TAA GAT TTC AAC ATC AGA ATC GAA ATC GAT ATT ACT GGT CCA GCA |
|    |                       |                              |                     | BIP(B1c+B2) | GAT ATG TAC ATT TGT ACA GTC AGT ACC TGC TTT CAC TTT TAG GCG     |
|    |                       |                              |                     | LF          | CGA TAA TGT CAC CTG CAG TTA CAA                                 |
|    |                       |                              |                     | LB          | GAA GGT GCT ACA TTC CGT GC                                      |
|    |                       |                              |                     | F3          | CAC CTT CAT GGA TAT CGA GAT T                                   |
|    |                       |                              |                     | B3          | TGG AGG ATT TAA GCC ATC TC                                      |
|    |                       |                              |                     | FIP(F1c+F2) | CGA GCG TAC AGC TGC AAA ATG ATA TCT TTC GAT ACC ACG ACC T       |
| 9  | <i>E. coli-LAMP</i>   | <i>Escherichia coli</i>      | <i>malB</i>         | BIP(B1c+B2) | CCC TTC TCC CTT TGT AAC AAG ATG ACG CAT AGT CAG CCC AT          |
|    |                       |                              |                     | LF          | TAA CGA AAG CCT GGG GCG                                         |
|    |                       |                              |                     | LB          | CCT GTC ATC GAC AGC AAC ATT CA                                  |
|    |                       |                              |                     | F3          | CCA ACA GTA TAT AGT GCA ACT TC                                  |
|    |                       |                              |                     | B3          | TTG CAT TTT CTA CCA TTT TTT TCG                                 |
|    |                       |                              |                     | FIP(F1c+F2) | AAT GTC ATT GGT TGA CCT TTG TAC AAT TAC ATA AAG AAC CTG CGA C   |
|    |                       |                              |                     | BIP(B1c+B2) | GAC TAT TAT TGG TTG ATA CAC CTG ACA CTT GCT TCA GGA CCA TAT T   |
|    |                       |                              |                     | LF          | AAC CGT ATC ACC ATC AAT CGC                                     |
| 10 | <i>S. aureus-LAMP</i> | <i>Staphylococcus aureus</i> | <i>nuc</i>          | LB          | CAA AGC ATC CTA AAA AAG GTG TAG AGA                             |



3

4 **TABLE 2** Outcomes of nine types of LAMP assays of clinical samples, compared with the diagnostic PCR and *16S rRNA*  
 5 sequencing assays<sup>a</sup>

| Species                        | LAMP   |         |       |             | PCR    |         |       |             | <i>16S rRNA</i> sequencing |         |       |             |
|--------------------------------|--------|---------|-------|-------------|--------|---------|-------|-------------|----------------------------|---------|-------|-------------|
|                                | P/T    | N/T     | F/T   | Sensitivity | P/T    | N/T     | F/T   | Sensitivity | P/T                        | N/T     | F/T   | Sensitivity |
| <i>Enterococcus sp. common</i> | 87/140 | 53/140  | 0/140 | 100%        | 87/140 | 53/140  | 0/140 | 100%        | NA                         | NA      | NA    | NA          |
| <i>E. faecalis</i>             | 27/140 | 113/140 | 0/140 | 100%        | 27/140 | 113/140 | 0/140 | 100%        | 25/140                     | 113/142 | 2/140 | 92.6%       |
| <i>E. faecium</i>              | 27/140 | 113/140 | 0/140 | 100%        | 27/140 | 113/140 | 0/140 | 100%        | 26/140                     | 109/140 | 5/140 | 83.9%       |
| <i>E. hirae</i>                | 20/140 | 120/140 | 0/140 | 100%        | 20/140 | 120/140 | 0/140 | 100%        | 20/140                     | 119/140 | 1/140 | 95.2%       |
| <i>E. gallinarum</i>           | 9/140  | 131/140 | 0/140 | 100%        | 9/140  | 131/140 | 0/140 | 100%        | 0/140                      | 131/140 | 9/140 | 0%          |
| <i>E. avium</i>                | 1/140  | 139/140 | 0/140 | 100%        | 1/140  | 139/140 | 0/140 | 100%        | 1/140                      | 139/140 | 0/140 | 100%        |
| <i>E. cecorum</i>              | 3/140  | 137/140 | 0/140 | 100%        | 3/140  | 137/140 | 0/140 | 100%        | NA                         | NA      | NA    | NA          |
| <i>E. coli</i>                 | 38/140 | 102/140 | 0/140 | 100%        | 38/140 | 102/140 | 0/140 | 100%        | 38/140                     | 100/140 | 2/140 | 95%         |
| <i>S. aureus</i>               | 10/140 | 130/140 | 0/140 | 100%        | 10/140 | 130/140 | 0/140 | 100%        | NA                         | NA      | NA    | NA          |

6 <sup>a</sup>P, number of true positives; T, number of total samples; N, number of true negatives; F, number of false positives and false  
 7 negatives; NA, not applicable.

8
